# Supplementary material for: Porous confinement: stable and full exposure of Ru nanoparticles towards efficient electrocatalytic hydrogen evolution
Source: Royal Society of Chemistry journal article supplement (doi:10.1039/d5cc06822c), 2026-01-01
Supplement: d5cc06822c1.pdf [file d5cc06822c1.pdf]

Supplementary Information

**Porous confinement: Stable and full exposure of Ru nanoparticles  
towards efficient electrocatalytic hydrogen evolution**

*Qingying Qiao, Leyi Zhang, Jinping Zhang,\* Wenqing Zhang, Han Lu, Shaohan Zhu, Fei Li,  
Fenghua Zhang,\* Wei Wei\* and Yongya Zhang\**

## Experimental

### 1. Materials

High-purity argon (Ar) and 5% H<sub>2</sub>/Ar mixed gases were supplied by *Comfort Gas Co., Ltd.* Activated carbon, 2,2'-azobis(2-methylpropionamidine) dihydrochloride (AIBA) and ruthenium(III) chloride hydrate (RuCl<sub>3</sub>·xH<sub>2</sub>O) were purchased from *J&K*. 1-vinylimidazole, 1,2-dibromoethane and potassium hydroxide (KOH) were acquired from *Macklin Inc.* Commercial Pt/C catalyst (20 wt% Pt) was purchased from *Alfa Aesar*. 1-vinyl-3-butylimidazolium bromide (VBImBr) was supplied by the Centre for Green Chemistry and Catalysis, *LICP, CAS*. All experimental water was obtained via an ultrapure water purification system. Other chemicals and solvents were obtained from local suppliers and used as received.

### 2. Preparation

#### 2.1. Synthesis of ionic crosslinker *N, N*-ethylene bisvinylimidazolium bromide (EBVImBr)

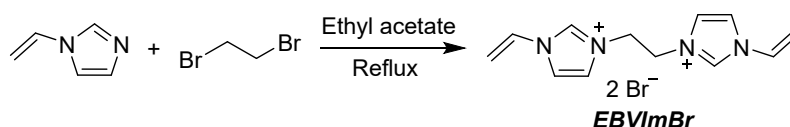

1-Vinylimidazole (1.882 g, 20 mmol) was dissolved in 10 mL ethyl acetate in a 100 mL round-bottom flask. Subsequently, 1,2-dibromoethane (1.879 g, 10 mmol) was dissolved in another 10 mL ethyl acetate and added to the flask dropwise. The obtained mixture was stirred and heated in an oil bath at 80 °C for 12 h, leading to the precipitation of a large amount of white powder. After the solution was cooled to room temperature, the liquid phase was decanted. The resulting white powder was washed with ethyl acetate three times to remove residual impurities, dried by rotary evaporation, and further vacuum-dried to constant weight. The white powder solid of 3.651g was obtained in a 97% yield.

<sup>1</sup>H NMR (400 MHz, D<sub>2</sub>O, TMS) δ (ppm): 9.11 (s, 2H), 7.82 (s, 2H), 7.54 (s, 2H), 7.10 (dd, J = 16.0, 8.0 Hz, 2H), 6.10 (dd, J = 8.0, 4.0 Hz, 2H), 5.51 (dd, J = 8.0, 4.0 Hz, 2H), 4.81 (s, 4H); <sup>13</sup>C NMR (100 MHz, D<sub>2</sub>O, TMS) δ (ppm): 135.85, 127.94, 122.53, 120.95, 111.56, 59.26.

## 2.2. Synthesis of RuO<sub>2</sub>/PIL

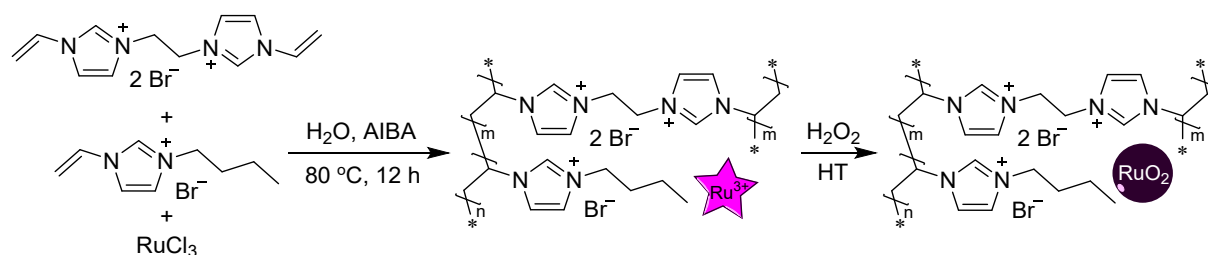

VBImBr (0.752 g, 3.25 mmol) and EBVImBr (0.752 g, 2 mmol) with a mass ratio of 1:1 were accurately weighed into a 50 mL round-bottom flask. 2 mL of ultrapure water was added, and the mixture was sonicated for 15 min to form a clear and transparent solution. Then, RuCl<sub>3</sub>·xH<sub>2</sub>O (50 mg, with Ru of approximately 20 mg) was added to the above mixed solution and stirred at room temperature for 2 h to form a homogeneous dispersion. Subsequently, 150 mg of AIBA was added and the mixture was then heated and stirred in an oil bath at 80 °C for 12 h. After polymerization, brown solid was obtained. To convert the Ru species to RuO<sub>2</sub>, hydrogen peroxide (H<sub>2</sub>O<sub>2</sub>, 30 wt%) was slowly added to the solid particles, which were then transferred to a hydrothermal autoclave and heated at 200 °C for 3 h to ensure complete oxidation to obtain dark brown solid RuO<sub>2</sub>/PIL.

## 2.3. Synthesis of Ru/PIL-PC-T

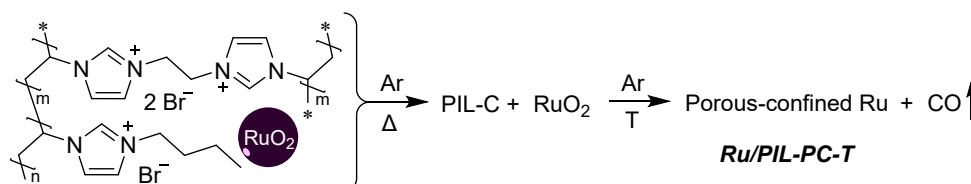

The as-prepared RuO<sub>2</sub>/PIL composite was divided into four equal parts and pyrolyzed at 500 °C, 600 °C, 700 °C, 800 °C, respectively. Calcination was performed under Ar atmosphere with a heating rate of 2 °C min<sup>-1</sup> and a holding time of 2 h. Finally, the Ru/PIL-PC-T catalysts were obtained, where T represents the pyrolysis temperature.

## 2.4. Synthesis of PILC-700

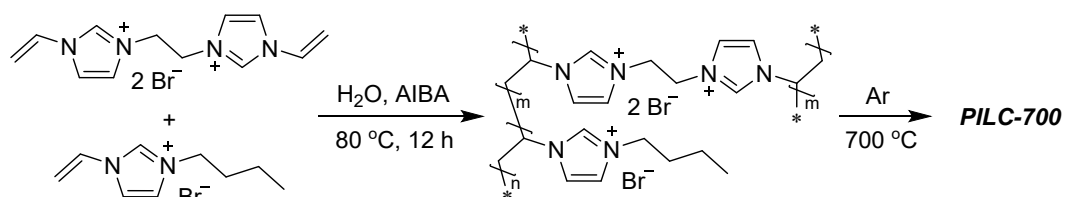

VBImBr (0.752 g, 3.25 mmol) and EBVImBr (0.752 g, 2 mmol) with a mass ratio of 1:1 were accurately weighed into a 50 mL round-bottom flask. 2 mL of ultrapure water was added, and

the mixture was sonicated for 15 min to form a clear and transparent solution. Then, 150 mg of AIBA was added and the mixture was heated and stirred in an oil bath at 80 °C for 12 h. After polymerization, white solid was obtained which was then pyrolyzed at 700 °C under Ar atmosphere with a heating rate of 2 °C min<sup>-1</sup> and a holding time of 2 h to acquire black powder PILC-700.

### 2.5. Synthesis of Ru/r-PILC

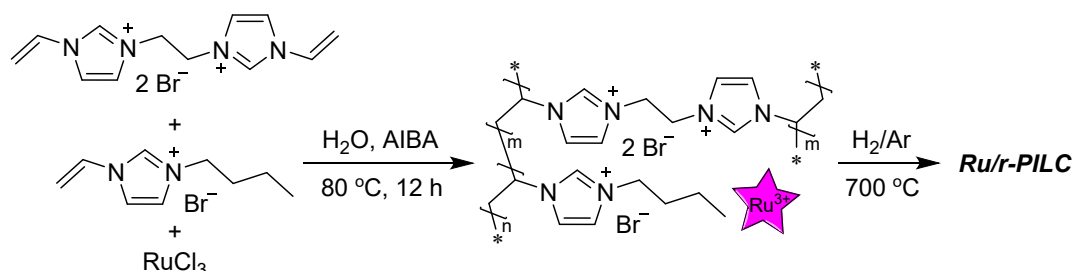

VBIImBr (0.188 g, 0.8 mmol) and EBVIImBr (0.188 g, 0.5 mmol) with a mass ratio of 1:1 were accurately weighed into a 50 mL round-bottom flask. 0.5 mL of ultrapure water and 1 mL of ethanol was added, and the mixture was sonicated to form a homogeneous solution. Then, RuCl<sub>3</sub>·xH<sub>2</sub>O (12 mg, with Ru of approximately 5 mg) was added to the above mixed solution and stirred at room temperature for 2 h to form a homogeneous dispersion. Subsequently, 40 mg of AIBA was added and the mixture was then heated and stirred in an oil bath at 80 °C for 12 h. After polymerization, brown solid was obtained which was then pyrolyzed at 700 °C under H<sub>2</sub>/Ar reduced atmosphere with a heating rate of 2 °C min<sup>-1</sup> and a holding time of 2 h to acquire black powder Ru/r-PILC.

### 2.6. Synthesis of Ru@AC

Activated carbon (75.24 mg) was added in a 50 mL round-bottom flask, then RuCl<sub>3</sub>·xH<sub>2</sub>O (12 mg, with Ru of approximately 5 mg) was dissolved in 5 mL of ultrapure water and added dropwise. The mixture was sonicated for 3 h to facilitate the impregnation and dispersion of Ru precursors on activated carbon surface. Subsequently, the mixture was stirred at room temperature for 48 h. The obtained black suspension was rapidly cooled with liquid nitrogen and then vacuum-dried for another 48 h to obtain black particles. After annealed at 700 °C under Ar atmosphere with a heating rate of 2 °C min<sup>-1</sup> and a holding time of 2 h, the product Ru@AC was obtained.

## 3. Instruments and Characterizations

Transmission Electron Microscopy (TEM) analysis was performed on a JEOL JEM-F200 microscope (JEOL Ltd., Japan) to characterize the morphology and size of the as-prepared samples. N<sub>2</sub> adsorption-desorption measurements were conducted at 77 K using a Micromeritics ASAP 2460 analyzer (Micromeritics Instrument Corp., USA) to evaluate the specific surface area and porous structure of the catalysts. Powder X-ray Diffraction (XRD) patterns were collected on a Bruker D8 Discover X-ray diffractometer (Bruker Corp., Germany) equipped with a Cu K $\alpha$  radiation source ( $\lambda = 1.5406 \text{ \AA}$ ). The scanning was performed from 5° to 90° at a rate of 5°/min to identify the crystalline phases of the catalysts. Raman spectra were recorded using a Zolix Raman spectrometer (Zolix Instruments Co., Ltd., China) with a 532 nm excitation wavelength (employing a helium-cadmium laser source and a CCD detector) to investigate the graphitization degree and defect density of the carbon supports. X-ray Photoelectron Spectroscopy (XPS) analysis was carried out on a Thermo Fisher Scientific K-Alpha spectrometer (Thermo Fisher Scientific Inc., USA) with a monochromatic Al K $\alpha$  X-ray source ( $h\nu = 1486.6 \text{ eV}$ ). All binding energy data were calibrated against the C 1s peak at 284.8 eV. The XPS spectra were fitted and analyzed using Avantage software to determine the elemental composition and chemical valence states of metal atoms in the catalysts. Thermogravimetric (TG) analysis was carried out using a NETZSCH STA449 F3 Jupiter instrument (Netzsch, Germany) at a heating rate of 10 °C /min with a sample weight of approximately 5-8 mg in air atmosphere.

#### 4. Electrochemical Measurements

The electrocatalytic hydrogen evolution reaction (HER) performance was evaluated using a standard three-electrode configuration on a CHI-760E electrochemical workstation. A platinum plate (10 mm  $\times$  10 mm) and a HgO/Hg electrode (filled with 1.0 M KOH) served as the counter and reference electrodes, respectively. The working electrode was a glassy carbon electrode (GCE, 3 mm in diameter) coated with 8  $\mu$ L of catalyst ink. This ink was fabricated by ultrasonically dispersing 4 mg of catalyst in a solution containing 700  $\mu$ L deionized water, 270  $\mu$ L ethanol, and 30  $\mu$ L of a 5 wt% Nafion solution. All measured potentials against the HgO/Hg reference were converted to the reversible hydrogen electrode (RHE) scale using the following equation:

$$E_{vs\ RHE} = E_{vs\ HgO/Hg} + E_{HgO/Hg}^{\theta}(0.0978\ V) + 0.0592\ pH$$

Where  $E_{vs\ RHE}$  signifies the potential versus the RHE,  $E_{vs\ HgO/Hg}$  is the potential relative to HgO/Hg electrode,  $E_{HgO/Hg}^{\theta}$  implies the standard electrode potential of HgO/Hg electrode.

Linear sweep voltammetry (LSV) polarization curves were recorded in 1.0 M KOH at a scan rate of  $5\text{ mV s}^{-1}$  with iR compensation. The corresponding Tafel slopes were then derived by fitting the polarization data to the Tafel equation:

$$\eta = a + b \log j$$

where  $\eta$  means overpotential of catalyst,  $a$  stands for intercept,  $b$  represents Tafel slope, and  $j$  represents the current density.

Electrochemical impedance spectroscopy (EIS) measurements were conducted over a frequency range of 0.1 to 100 kHz. To evaluate the electrochemical active surface area (ECSA), the electrochemical double-layer capacitance ( $C_{dl}$ ) was determined. This was derived from cyclic voltammetry (CV) scans recorded at various scan rates (20, 30, 40, 50, and  $60\text{ mV s}^{-1}$ ) in the non-faradaic region.

The active site densities of the Ru-based catalysts were characterized by copper underpotential deposition ( $Cu_{UPD}$ ). The experiments were performed in a solution containing 0.5 M  $H_2SO_4$  and 5 mM  $CuSO_4$ . Prior to  $Cu_{UPD}$ , the working electrode was first cycled by cyclic voltammetry in a pure 0.5 M  $H_2SO_4$  solution at a scan rate of  $10\text{ mV s}^{-1}$ . Subsequently, the electrode was transferred to the  $CuSO_4$ -containing electrolyte and polarized at constant potentials of 0.220, 0.215, 0.210, 0.205, 0.200, 0.195 and 0.190 V (vs. RHE) for 100 s each to form a submonolayer of copper. The number of active sites ( $n$ ) and the mass-based active site density (MSD) were then determined from the stripping charge ( $Q$ ) of the deposited copper ( $Cu_{UPD} \rightarrow Cu^{2+} + 2e^-$ ) using the following equation:

$$n = Q / 2F$$

$$MSD = n / m$$

Where  $F$  is the Faraday constant ( $96500\text{ C mol}^{-1}$ ),  $m$  represents the mass of catalysts.

## Supplementary Figures

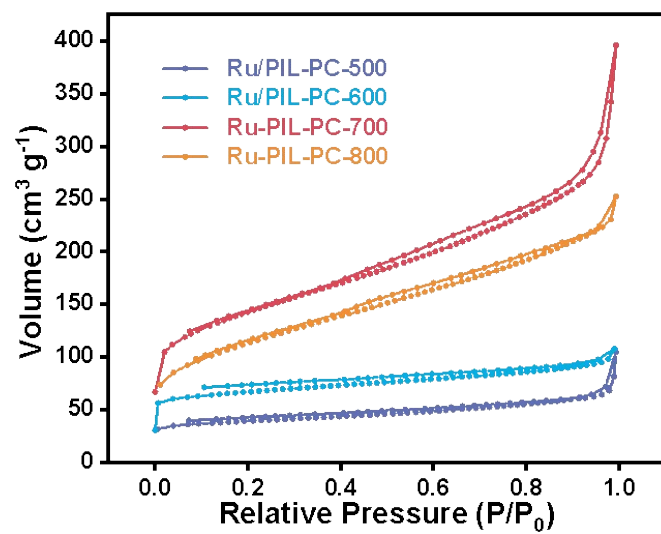

**Fig. S1** N<sub>2</sub> adsorption/desorption isotherms of Ru/PIL-PC-T.

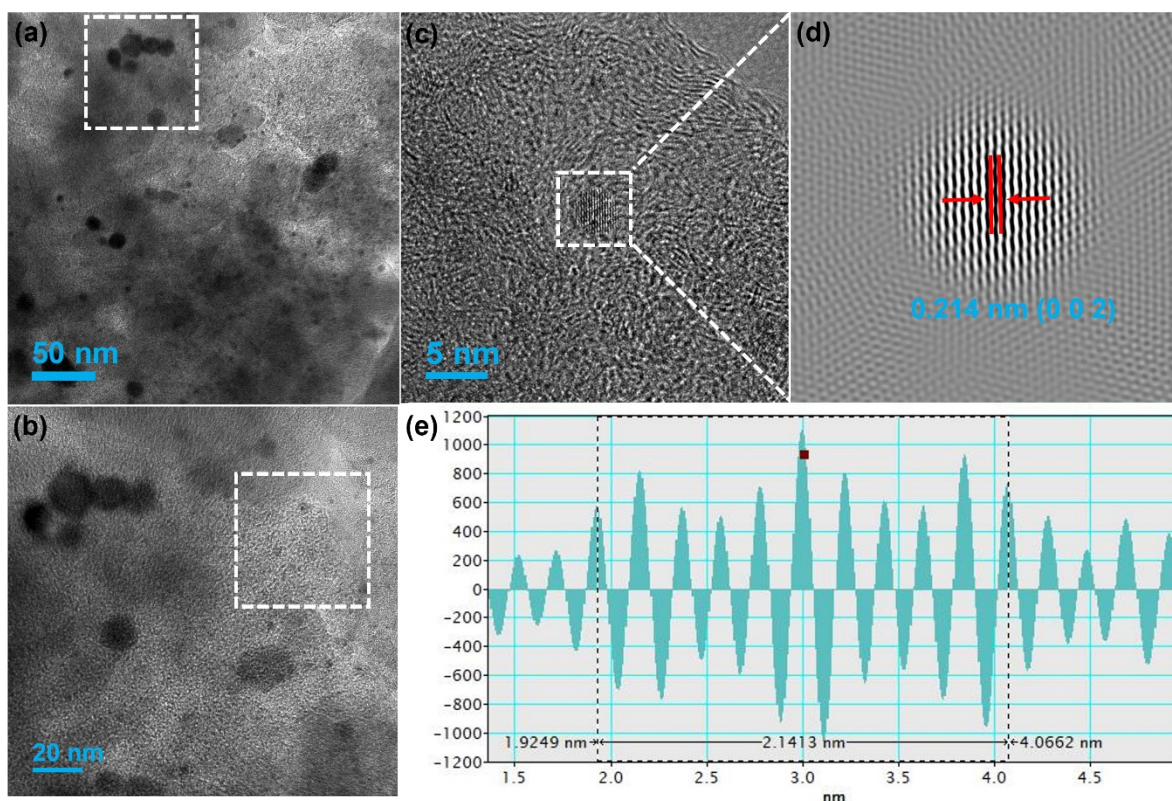

**Fig. S2** TEM images (a,b) and HR-TEM images (c-e) of Ru@AC.



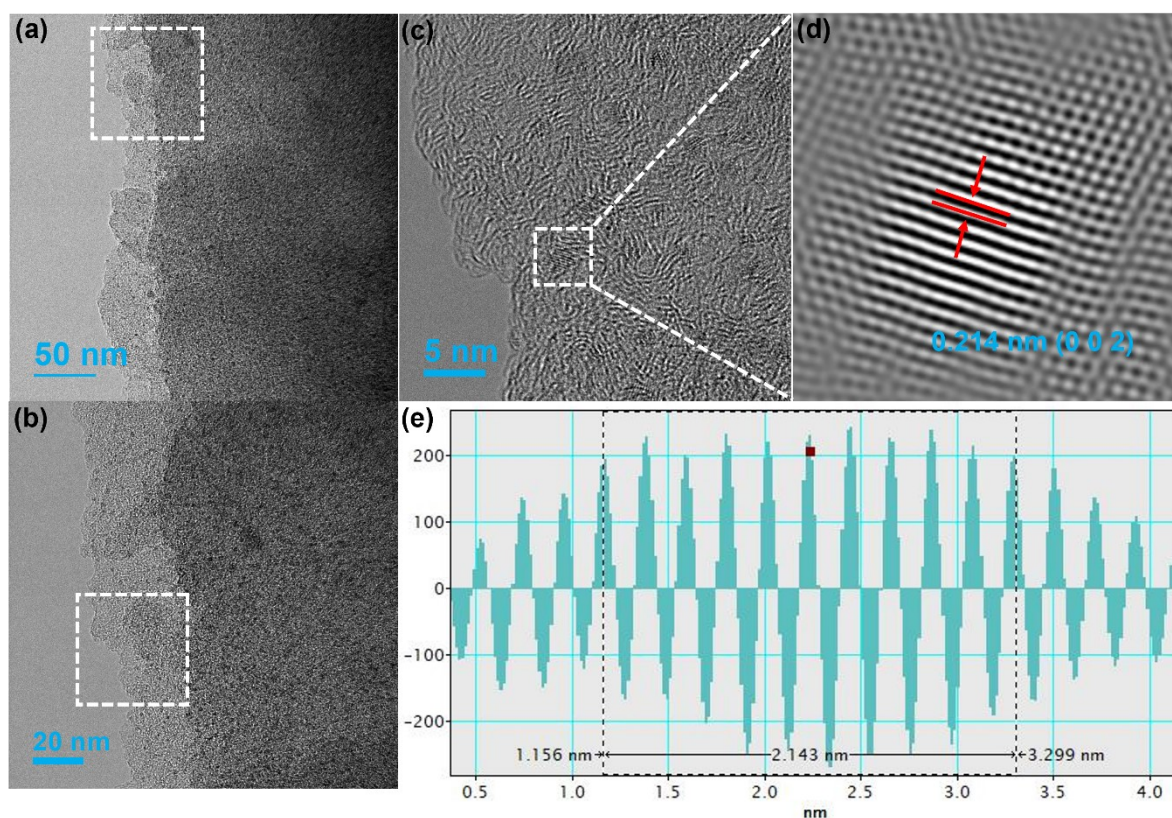

**Fig. S3** TEM images (a,b) and HR-TEM images (c-e) of Ru/r-PILC.

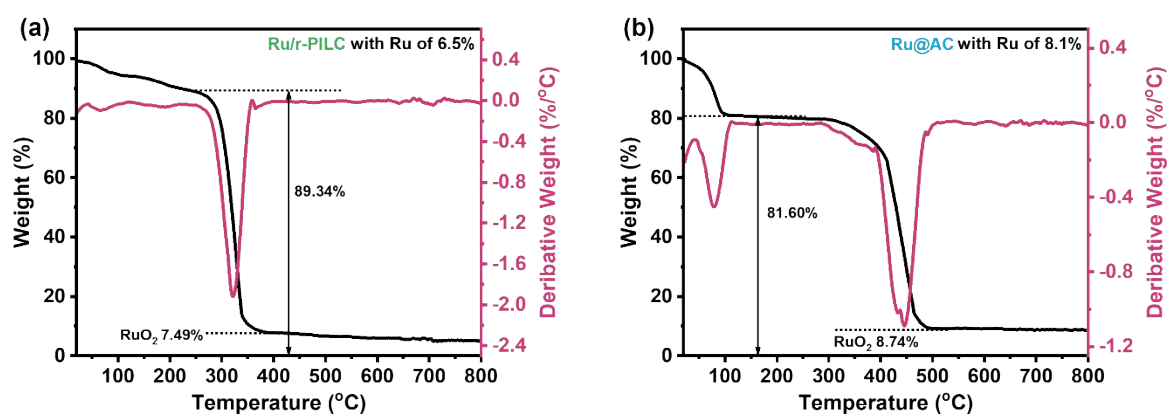

**Fig. S4** TG and DTG curves of (a) Ru/r-PILC and (b) Ru@AC under air atmosphere.



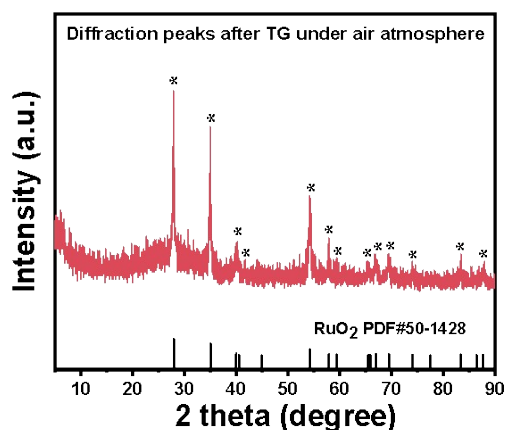

**Fig. S5** Diffraction peaks of the samples after TG measurement under air atmosphere.

XRD analysis of Ru/PIL-PC-700, Ru/r-PILC and Ru@AC after TG measurement under air atmosphere all revealed the diffraction peaks of  $\text{RuO}_2$ , the TG content of Ru for each sample was calculated by converting the mass of  $\text{RuO}_2$  to Ru and dividing it by the dry weight of the sample before thermal decomposition.

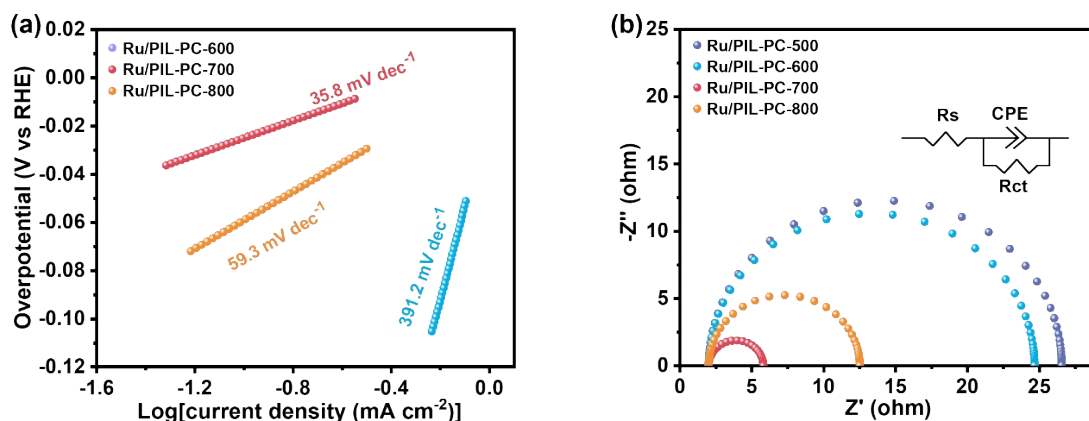

**Fig. S6** (a) Tafel plots and (b) electrochemical impedance spectra of Ru/PIL-PC-500, Ru/PIL-PC-600, Ru/PIL-PC-700 and Ru/PIL-PC-800.

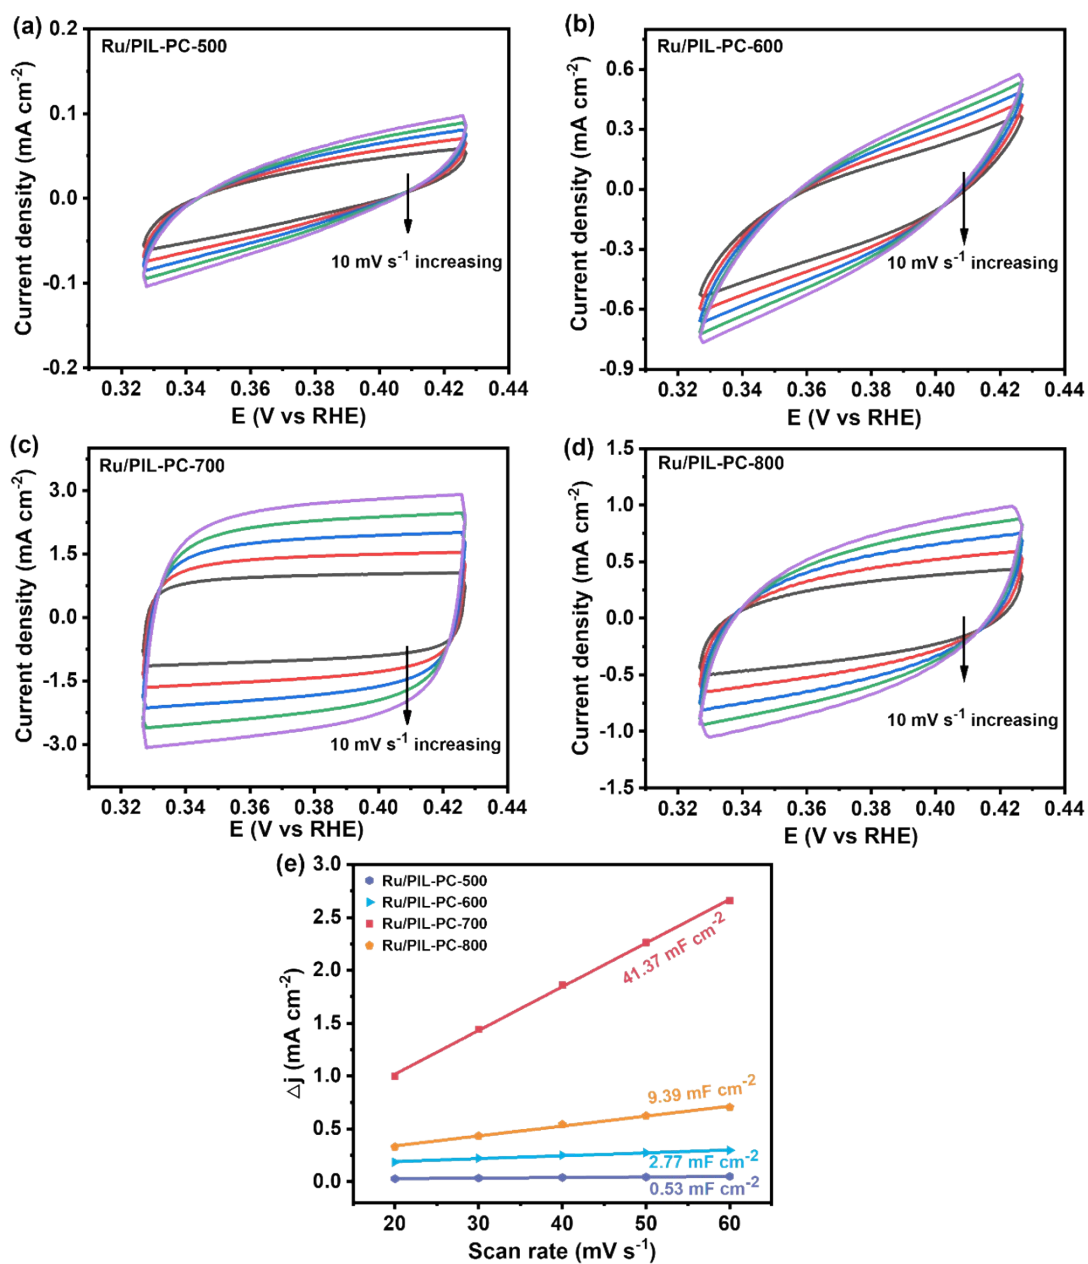

**Fig. S7** CV curves of (a) Ru/PIL-PC-500, (b) Ru/PIL-PC-600, (c) Ru/PIL-PC-700 (d) Ru/PIL-PC-800 catalysts at the scan rate of 20, 30, 40, 50, 60  $\text{mV s}^{-1}$  in 1 M KOH solution; (e) The corresponding  $C_{dl}$  calculated by linear fitting of the capacitive currents at 0.38V vs. scan rates.

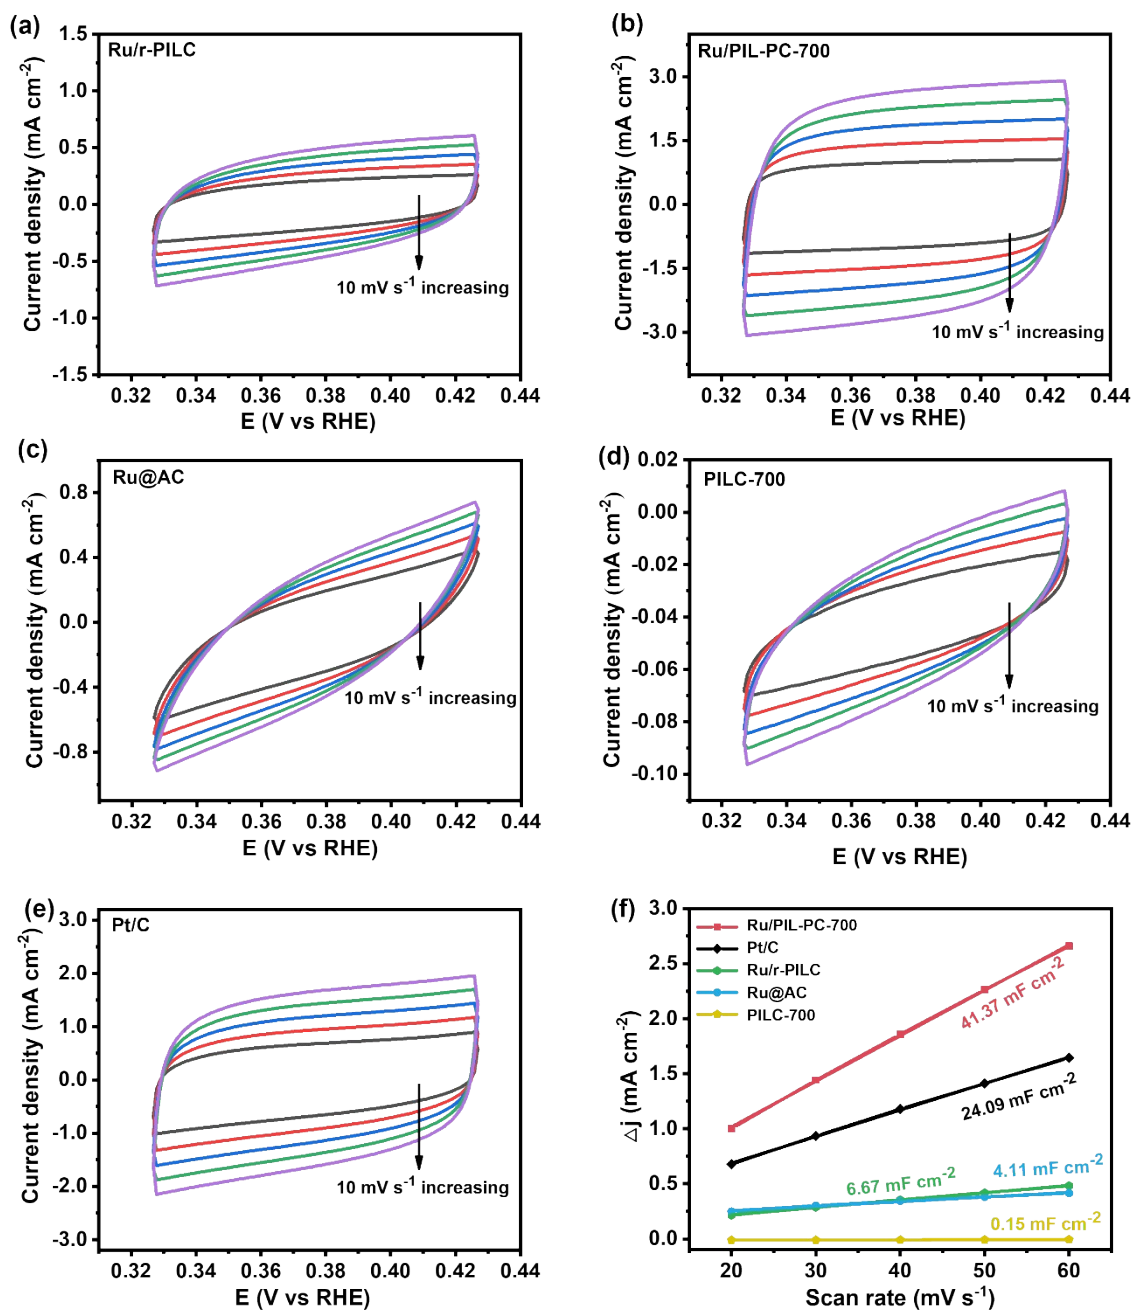

**Fig. S8** CV curves of (a) Ru/r-PILC, (b) Ru/PIL-PC-700, (c) Ru@AC, (d) PILC-700, (e) Pt/C catalysts at the scan rate of 20, 30, 40, 50, 60  $\text{mV s}^{-1}$  in 1 M KOH solution; (f) The corresponding  $C_{dl}$  calculated by linear fitting of the capacitive currents at 0.38V vs. scan rates.

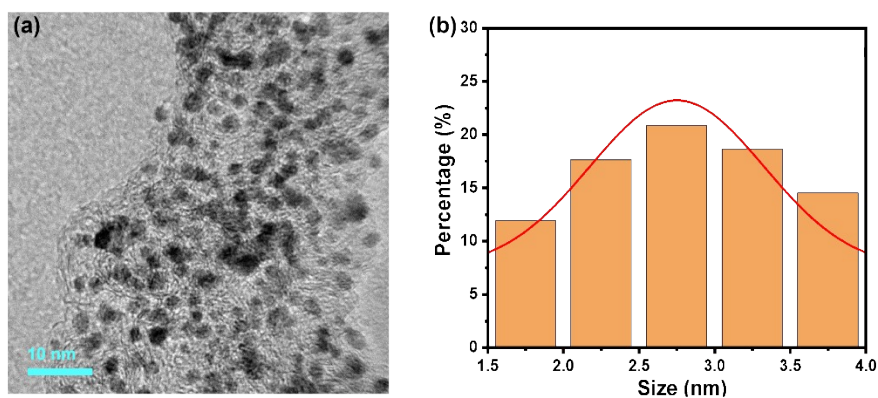

**Fig. S9** (a) TEM image of commercial Pt/C, (b) the corresponding size distribution of Pt nanoparticles.

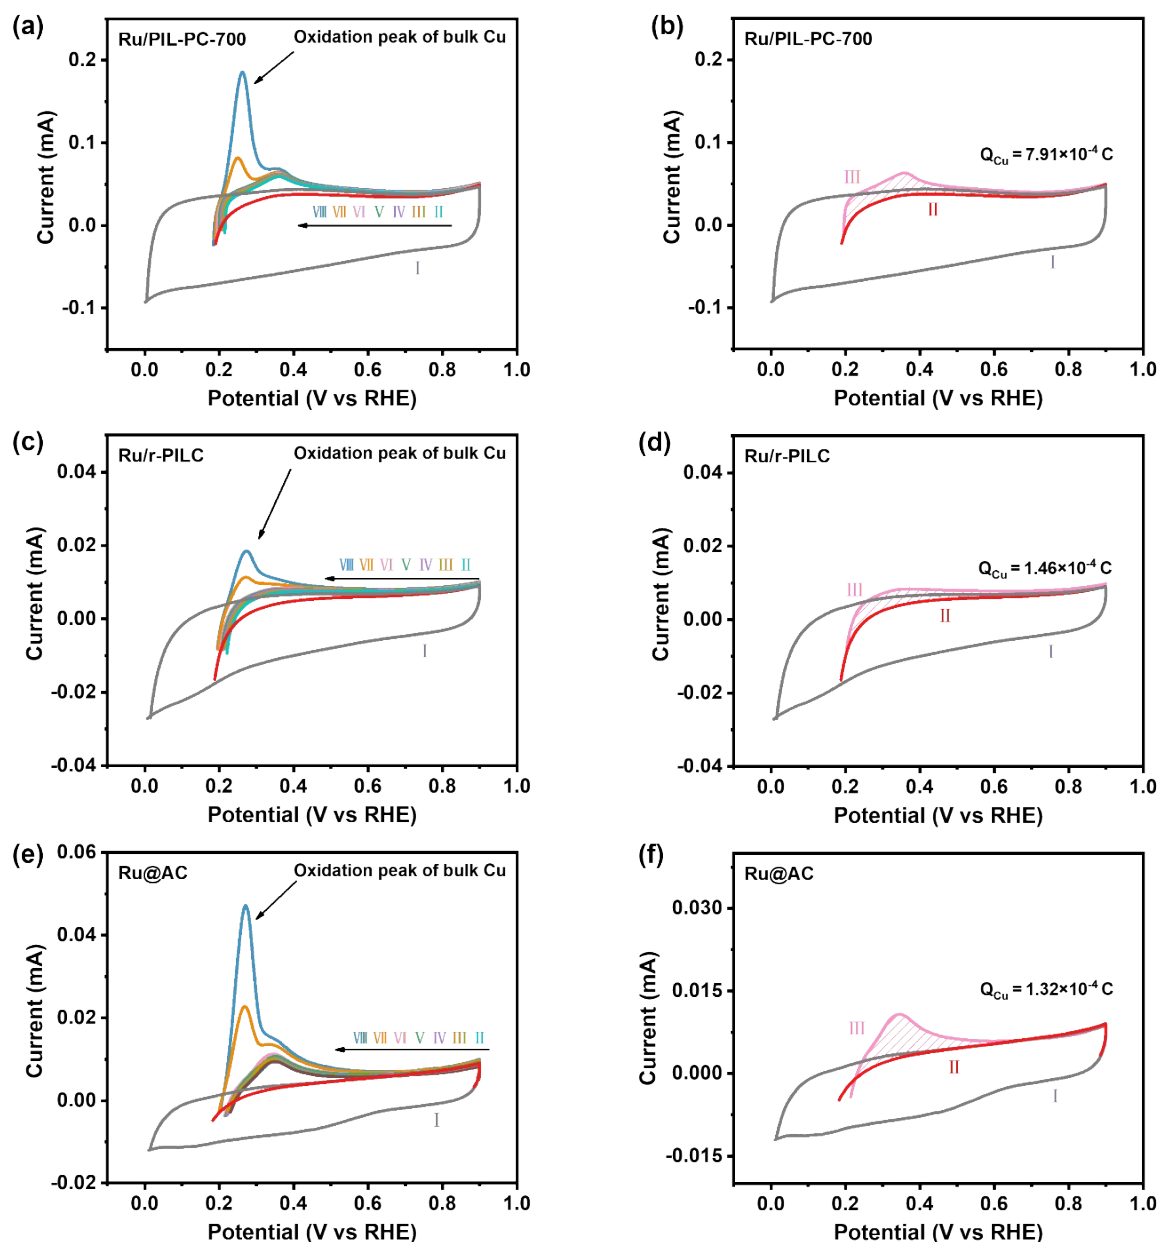

**Fig. S10** Copper UPD in 0.5 M  $\text{H}_2\text{SO}_4$  in the (I) absence and (II~VIII) presence of 5 mM  $\text{CuSO}_4$  on (a) Ru/PIL-PC-700, (c) Ru/r-PILC and (e) Ru@AC, respectively. For II~VIII, the electrode was polarized at 0.185, 0.190, 0.195, 0.200, 0.205, 0.210 and 0.215 V for 100 s to form the UPD layers on Ru/PIL-PC-700, 0.190, 0.195, 0.200, 0.205, 0.210, 0.215 and 0.220 V for 100 s to form the UPD layers on Ru/r-PILC, and 0.180, 0.185, 0.190, 0.195, 0.200, 0.205 and 0.210 V for 100 s to form the UPD layers on Ru@AC, respectively. Copper UPD in 0.5 M  $\text{H}_2\text{SO}_4$  in the (I, II) absence and (III) presence of 5 mM  $\text{CuSO}_4$  on (b) Ru/PIL-PC-700, (d) Ru/r-PILC and (f) Ru@AC. For II and III, the electrode was polarized at (b) 0.195 V, (d) 0.200 V and (f) 0.190 V for 100 s to form the UPD layer.

[

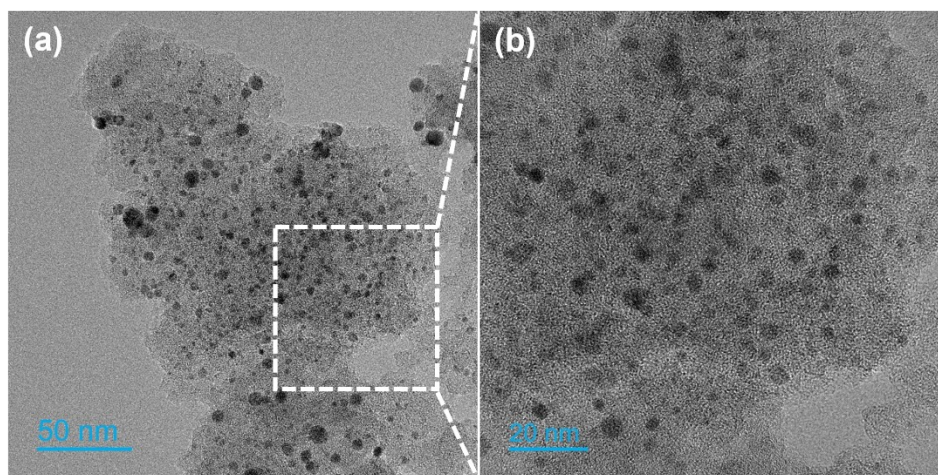

**Fig. S11** TEM images of Ru/PIL-PC-700 after recycling.

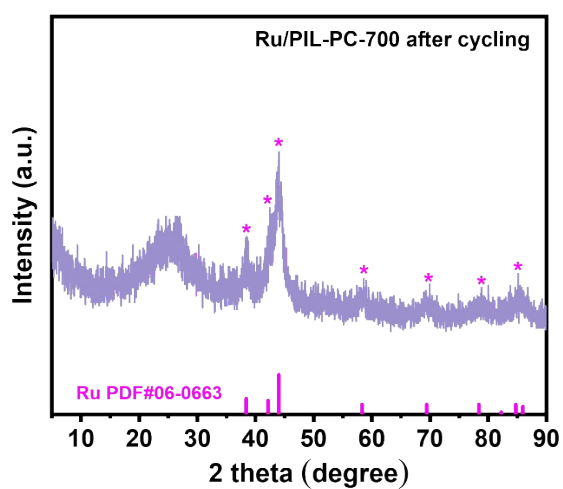

**Fig. S12** XRD pattern of Ru/PIL-PC-700 after recycling.

## Supplementary Tables

**Table S1** Performance comparison of state-of-the-art electrocatalysts for the hydrogen evolution reaction in 1.0 M KOH.

| Catalysts                                        | Overpotential at<br>10 mA cm <sup>-2</sup> (mV) | Tafel slope<br>(mV dec <sup>-1</sup> ) | Durability<br>(cycle) | Reference                                                                                         |
|--------------------------------------------------|-------------------------------------------------|----------------------------------------|-----------------------|---------------------------------------------------------------------------------------------------|
| Ru/PIL-PC-700                                    | 23                                              | 35.8                                   | 10000                 | this work                                                                                         |
| Pt/C (Benchmark)                                 | 24~35                                           | 36~45                                  | 5000                  | ACS Nano 2022, 16, 7993–8004; Adv. Mater. 2024, 36, 2400433; Adv. Funct. Mater. 2024, 34, 2411081 |
| Pt <sub>SA</sub> -Mn <sub>3</sub> O <sub>4</sub> | 24                                              | 54                                     | N.A. <sup>[a]</sup>   | Energy Environ. Sci. 2022, 15, 4592–4600                                                          |
| S-IrP <sub>2</sub> @CNT                          | 18.5                                            | 29.2                                   | 20000                 | ACS Catal. 2024, 14, 15015–15024                                                                  |
| IrMo-CBC                                         | 12                                              | 28.06                                  | 3000                  | J. Am. Chem. Soc. 2023, 145, 16548–16556                                                          |
| Pt/C <sub>60</sub>                               | 25                                              | 55                                     | 3000                  | Nat. Commun. 2023, 14, 2460                                                                       |
| Pt <sub>1.15wt%</sub> -Mo <sub>2</sub> C/NCH     | 40                                              | 41.4                                   | N.A.                  | Adv. Funct. Mater. 2025, e23916                                                                   |
| Id-Ru@a-Co/Ti                                    | 33.5                                            | 39.6                                   | N.A.                  | Chem. Commun. 2022, 58, 13588–13591                                                               |
| Fe-Mo <sub>2</sub> C@NCF                         | 65                                              | 76                                     | 1000                  | J. Mater. Chem. A 2020, 8, 19879                                                                  |
| CdNNi <sub>3</sub>                               | 167                                             | 40                                     | 1000                  | Adv. Mater. 2025, 37, 2504607                                                                     |
| CoP@Ni <sub>2</sub> P Fe <sub>2</sub> P          | 42                                              | 64                                     | 2000                  | Appl. Catal. B-Environ. 2023, 338, 123016                                                         |
| NFM-OV <sub>R</sub> /NF                          | 25                                              | 46.9                                   | 5000                  | Adv. Mater. 2024, 36, 2411134                                                                     |

<sup>[a]</sup> N. A. = Not available.



**Table S2** BET surface area and pore volume of different catalysts.

| Catalyst      | $S_{\text{BET}}$ ( $\text{m}^2 \text{g}^{-1}$ ) |
|---------------|-------------------------------------------------|
| Ru/PIL-PC-500 | 122.5                                           |
| Ru/PIL-PC-600 | 207.5                                           |
| Ru/PIL-PC-700 | 476.3                                           |
| Ru/PIL-PC-800 | 391.2                                           |

**Table S3** XPS data for the content and distribution of C 1s of different catalysts.

| Catalyst      | Concentration of different C speices / % |                         |            |            |
|---------------|------------------------------------------|-------------------------|------------|------------|
|               | $\text{sp}^2 \text{ C}$                  | $\text{sp}^3 \text{ C}$ | C-N/O      | C=N/O      |
|               | (284.8 eV)                               | (285.3 eV)              | (286.5 eV) | (288.2 eV) |
| Ru/r-PILC     | 50.3                                     | 23.6                    | 21.3       | 4.8        |
| Ru/PIL-PC-700 | 47.2                                     | 26.9                    | 21.2       | 4.7        |
| Ru@AC         | 50.9                                     | 29.7                    | 15.4       | 4.0        |

**Table S4** XPS data for the surface species of different catalysts.

| Catalyst      | Atomic/ weight percentages of surface elements (%) |                 |                 |                  |
|---------------|----------------------------------------------------|-----------------|-----------------|------------------|
|               | C (at.% / wt.%)                                    | N (at.% / wt.%) | O (at.% / wt.%) | Ru (at.% / wt.%) |
| Ru/r-PILC     | 78.09 / 69.79                                      | 5.10 / 5.32     | 16.04 / 19.10   | 0.77 / 5.79      |
| Ru/PIL-PC-700 | 83.37 / 73.46                                      | 4.56 / 4.69     | 10.84 / 12.73   | 1.23 / 9.12      |
| Ru@AC         | 87.40 / 79.55                                      | 1.22 / 1.30     | 10.55 / 12.79   | 0.83 / 6.36      |

The atomic percentage (at%) measured by XPS is converted into the weight percentage (wt%) by following equation:

$$x \text{ wt\%} = \frac{M_x \times x \text{ (at\%)}}{12.01 \times C \text{ (at\%)} + 14.01 \times N \text{ (at\%)} + 16.00 \times O \text{ (at\%)} + 101.07 \times Ru \text{ (at\%)}}$$

Where 12.01, 14.01, 16.00, and 101.07 are the atomic mass of C, N, O and Ru, respectively.

**Table S5** Comparison of HER performance of Ru NPs ever reported in 1.0 M KOH.

| Catalysts                            | Overpotential at<br>10 mA cm <sup>-2</sup> (mV) | Tafel slope<br>(mV dec <sup>-1</sup> ) | Durability<br>(cycle) | Reference                                             |
|--------------------------------------|-------------------------------------------------|----------------------------------------|-----------------------|-------------------------------------------------------|
| Ru/PIL-PC-700                        | 23                                              | 35.8                                   | 10000                 | this work                                             |
| Ru/Zn-N-C                            | 17.6                                            | 44.29                                  | 5000                  | Adv. Mater. 2024, 36,<br>2308798                      |
| BaRuO <sub>3</sub>                   | 26                                              | 26                                     | N.A.                  | J. Am. Chem. Soc.<br>doi.org/10.1021/jacs.<br>5c16183 |
| Ru-NBC                               | 27                                              | 38.15                                  | N.A.                  | ACS Nano 2025, 19,<br>7948–7961                       |
| Ru SA/Co <sub>3</sub> O <sub>4</sub> | 44                                              | 57                                     | N.A.                  | ACS Nano 2025, 19,<br>11176–11186                     |
| Ru <sub>3</sub> /OCNT                | 19                                              | 25.63                                  | N.A.                  | Adv. Funct. Mater.<br>2025, 35, 2503678               |
| Ru-RuO <sub>2</sub> /C               | 31                                              | 85.4                                   | N.A.                  | Adv. Sci. 2025, 12,<br>2414534                        |
| Fcc RuFe@fcc Ru                      | 17                                              | 14.5                                   | 1000                  | Nano Lett. 2025, 25,<br>9872–9879                     |
| Ru-Mo <sub>2</sub> C@CNT             | 15                                              | 26                                     | 10000                 | Nat. Commun. 2021,<br>12, 4018                        |
| homo-PIL-Ru/C-600                    | 16                                              | 42                                     | 10000                 | Small Methods 2021,<br>5, 2100505                     |
| Ru@GNs                               | 40                                              | 28                                     | 1000                  | Carbon 2020, 166,<br>388–395                          |
| Ru/PC                                | 21                                              | 46.6                                   | 1000                  | Green Chem. 2020,<br>22, 835–842                      |
| Ru@SC-CDs                            | 29                                              | 57                                     | 5000                  | Nano Energy 2019,<br>65, 104023                       |
| Ru@CN                                | 32                                              | 53                                     | 2000                  | Energy Environ. Sci.<br>2018, 11, 800–806             |

|                                                    |    |                      |      |                                              |
|----------------------------------------------------|----|----------------------|------|----------------------------------------------|
| Ru/Co-N-C                                          | 23 | 27.8                 | N.A. | Adv. Mater. 2022, 34,<br>2110103             |
| Ru@NCN                                             | 36 | 37                   | 5000 | J. Mater. Chem. A<br>2021, 9,<br>13958–13966 |
| Ru <sub>40</sub> @mONC                             | 28 | 25                   | 3000 | Nano Res. 2022, 15,<br>5134–5142             |
| V <sub>O</sub> -Ru/HfO <sub>2</sub> -OP            | 39 | 22                   | 5000 | Nat. Commun. 2022,<br>13, 1270               |
| Ru@NC                                              | 25 | 29                   | N.A. | Adv. Mater. 2023, 35,<br>2301133             |
| Ru/C <sub>3</sub> N <sub>4</sub> /C <sup>[a]</sup> | 79 | N. A. <sup>[b]</sup> | 1000 | J. Am. Chem. Soc.<br>2016, 138, 16174        |

---

<sup>[a]</sup> The electrolyte is 0.1 M KOH. <sup>[b]</sup> N. A. = Not available.
